# Supplementary material
Source: publisher figshare collection journal article supplement (https://acs.figshare.com/ndownloader/files/9963202)
Supplement: Supplementary file 1 [file 9963202]

# **Supporting Information**

## **Martian Redox Chemistry, Oxygen Reduction in Low Temperature Magnesium Perchlorate Brines**

Joseph Elliott, Kamonwad Ngamchuea, Christopher Batchelor-McAuley and Richard G. Compton\*

\* corresponding author: Richard G. Compton, Department of Chemistry, Physical & Theoretical Chemistry Laboratory, University of Oxford, South Parks Road, Oxford, OX1 3QZ, United Kingdom

Email: richard.compton@chem.ox.ac.uk. Tel: +44(0)1865275 957 Fax: +44(0)1865275410

## **S1 Chemical reagents and instrumentation**

Ferrocene methanol (97%) and magnesium perchlorate hexahydrate (99%) were purchased from Sigma-Aldrich and were used as received without any further purification. All solutions were prepared using deionised water with a resistivity of no less than 18.2 M $\Omega$  cm at 25 °C (Millipore UHQ, Vivendi, UK).

Electrochemical measurements were performed with a  $\mu$ Autolab Type III potentiostat (Utrecht) using standard three electrode setups. A glassy carbon macro- (CH Instruments, 3 mm diameter), a carbon micro- (IJ Cambria Scientific Ltd, 33  $\mu$ m diameter) or a gold micro- electrode (ALS, 7  $\mu$ m diameter) was used as a working electrode. Prior to use, the working electrodes were polished with alumina powders in the size sequence of 1.0  $\mu$ m, 0.3  $\mu$ m and 0.05  $\mu$ m (Buehler, USA) on soft lapping pads (Buehler, USA). A silver wire and a platinum mesh were used as reference and counter electrodes respectively.

## S2 Saturated oxygen concentrations

In the oxygen reduction experiments, oxygen gas was strongly bubbled into 2.77 M  $\text{Mg}(\text{ClO}_4)_2$  solutions. To ensure that the solution is saturated with oxygen, the bubble time is first optimized. Figure S1a shows cyclic voltammograms of oxygen reduction at different bubble times (0, 5 and 10 min). The plot of cathodic peak currents as a function of oxygen bubbling duration is presented in Figure S1b. It can be seen that after 5 min the peak current, and hence the amount of oxygen in solution, reaches a maximum value at 10.0  $\mu\text{A}$ , corresponding to oxygen concentration of 0.28 mM. Consequently, for all the oxygen reduction studies, oxygen is bubbled for 5 min prior to the measurements.

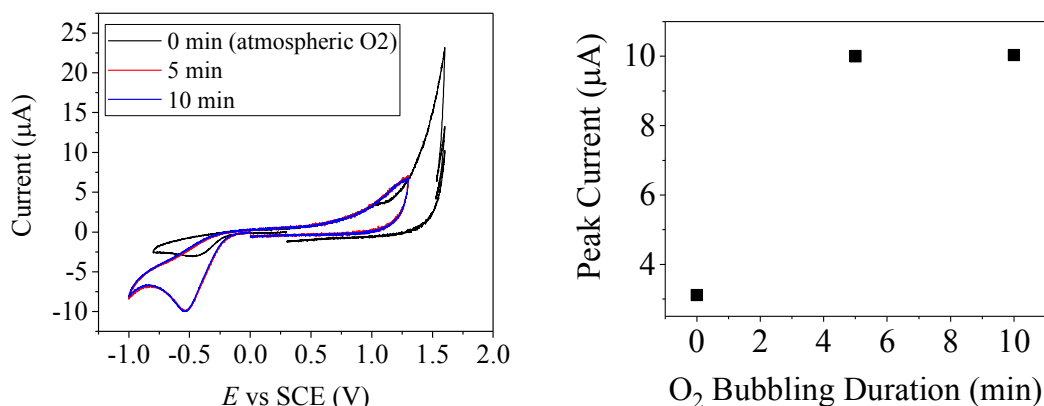

**Figure S1: a) Cyclic voltammograms of oxygen reduction in 2.77M  $\text{Mg}(\text{ClO}_4)_2$  at a glassy carbon macro-electrode at the scan rate of  $100 \text{ mV s}^{-1}$  at different oxygen bubbling duration (0, 5 and 10 min);  $25^\circ\text{C}$ . b) The cathodic peak currents of oxygen reduction as a function of oxygen bubbling duration.**

### S3 Voltammetry of hydrogen peroxide reduction

Cyclic voltammetry of 1.25 mM hydrogen peroxide ( $\text{H}_2\text{O}_2$ ) in deaerated 2.77 M  $\text{Mg}(\text{ClO}_4)_2$  solution was recorded at a gold micro-electrode at the scan rate of  $20 \text{ mV s}^{-1}$  at  $25^\circ\text{C}$ . Figure S2 shows the voltammetric response of  $\text{H}_2\text{O}_2$  reduction (blue line) as compared with that  $\text{O}_2$  reduction (black line). No reductive peak was observed in the cathodic scan of  $\text{H}_2\text{O}_2$  solution, evidencing that the product of  $\text{O}_2$  reduction is  $\text{H}_2\text{O}_2$  as  $\text{H}_2\text{O}_2$  cannot be reduced further in the potential window studied.

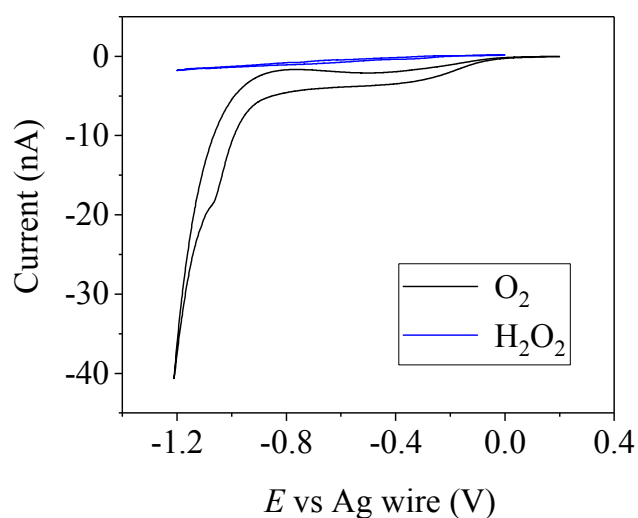

**Figure S2: Cyclic voltammograms of saturated (0.28 mM) oxygen reduction (black line) and 1.25 mM hydrogen peroxide reduction (blue line) in 2.77 M  $\text{Mg}(\text{ClO}_4)_2$  at a gold micro-electrode at the scan rate of  $20 \text{ mV s}^{-1}$  at  $25^\circ\text{C}$ .**

## S4 Oxygen reduction at different temperatures

Oxygen reduction in 2.77 M  $\text{Mg}(\text{ClO}_4)_2$  was studied at different temperatures. A glassy carbon macroelectrode together with a gold microelectrode were used to determine the concentrations and diffusion coefficients of oxygen in the electrolytes. The resulting voltammograms of oxygen reduction at 25.0 °C are presented in Figure 2 in the main text. Here, the voltammograms of oxygen reduction in 2.77 M  $\text{Mg}(\text{ClO}_4)_2$  at 5.0, -14.5 and -31.0 °C are presented in Figures S3, S4 and S5 respectively. The resulting values of oxygen concentrations and their diffusion coefficients at the different temperatures are presented in Figure 3 in the main text.

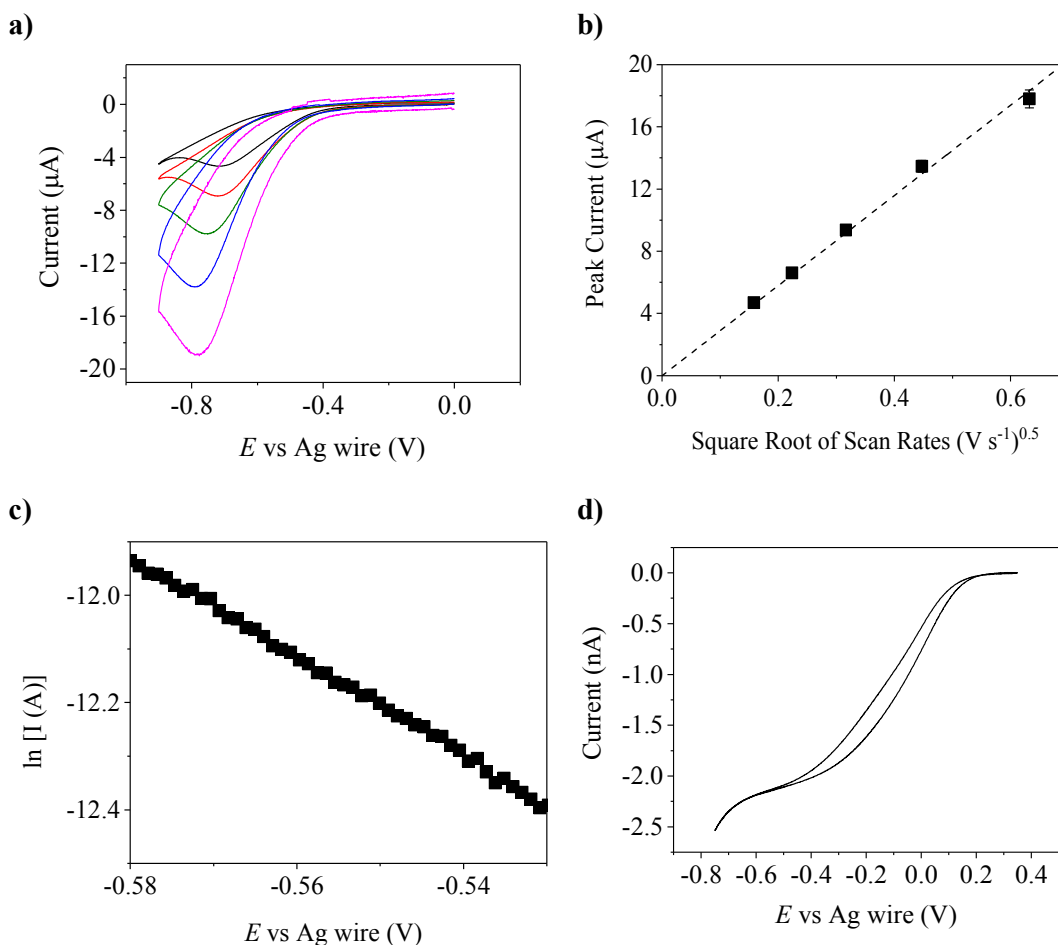

**Figure S3:** a) Cyclic voltammograms (CV) of oxygen reduction in 2.77 M  $\text{Mg}(\text{ClO}_4)_2$  at 5.0 °C at a glassy carbon electrode at a series of scan rates: 25  $\text{mV s}^{-1}$  (black), 50  $\text{mV s}^{-1}$  (red), 100  $\text{mV s}^{-1}$  (green), 200  $\text{mV s}^{-1}$  (blue), 400  $\text{mV s}^{-1}$  (pink). b) The plot of oxygen reduction peak currents as a function of the square root of scan rates. c) Tafel analysis of the CV of oxygen reduction at 400  $\text{mV s}^{-1}$ . d) CV of oxygen reduction in 2.77 M  $\text{Mg}(\text{ClO}_4)_2$  at 5.0 °C at a gold micro-electrode at the scan rate of 20  $\text{mV s}^{-1}$ .

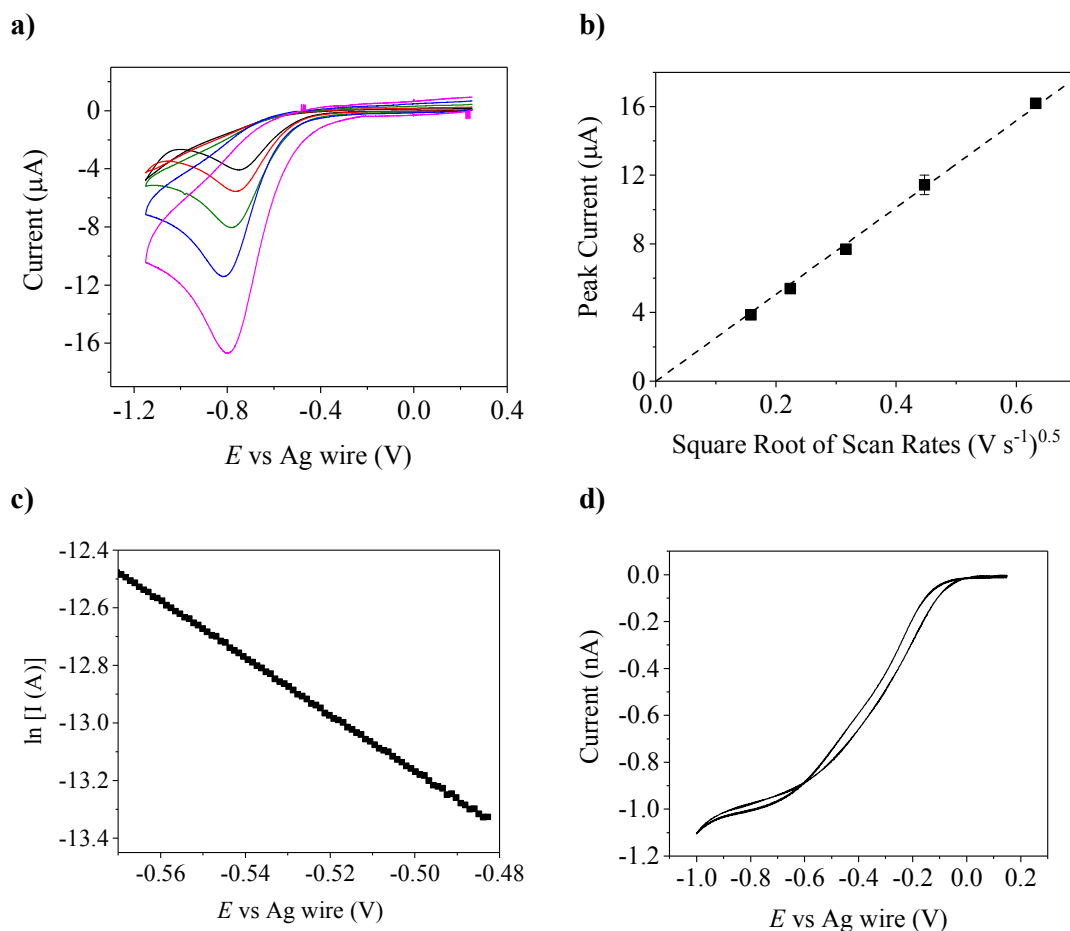

**Figure S4:** a) Cyclic voltammograms (CV) of oxygen reduction in 2.77 M  $\text{Mg}(\text{ClO}_4)_2$  at  $-14.5^\circ\text{C}$  at a glassy carbon electrode at a series of scan rates:  $25\text{ mV s}^{-1}$  (black),  $50\text{ mV s}^{-1}$  (red),  $100\text{ mV s}^{-1}$  (green),  $200\text{ mV s}^{-1}$  (blue),  $400\text{ mV s}^{-1}$  (pink). b) The plot of oxygen reduction peak currents as a function of the square root of scan rates. c) Tafel analysis of the CV of oxygen reduction at  $400\text{ mV s}^{-1}$ . d) CV of oxygen reduction in 2.77 M  $\text{Mg}(\text{ClO}_4)_2$  at  $-14.5^\circ\text{C}$  at a gold micro-electrode at the scan rate of  $20\text{ mV s}^{-1}$ .

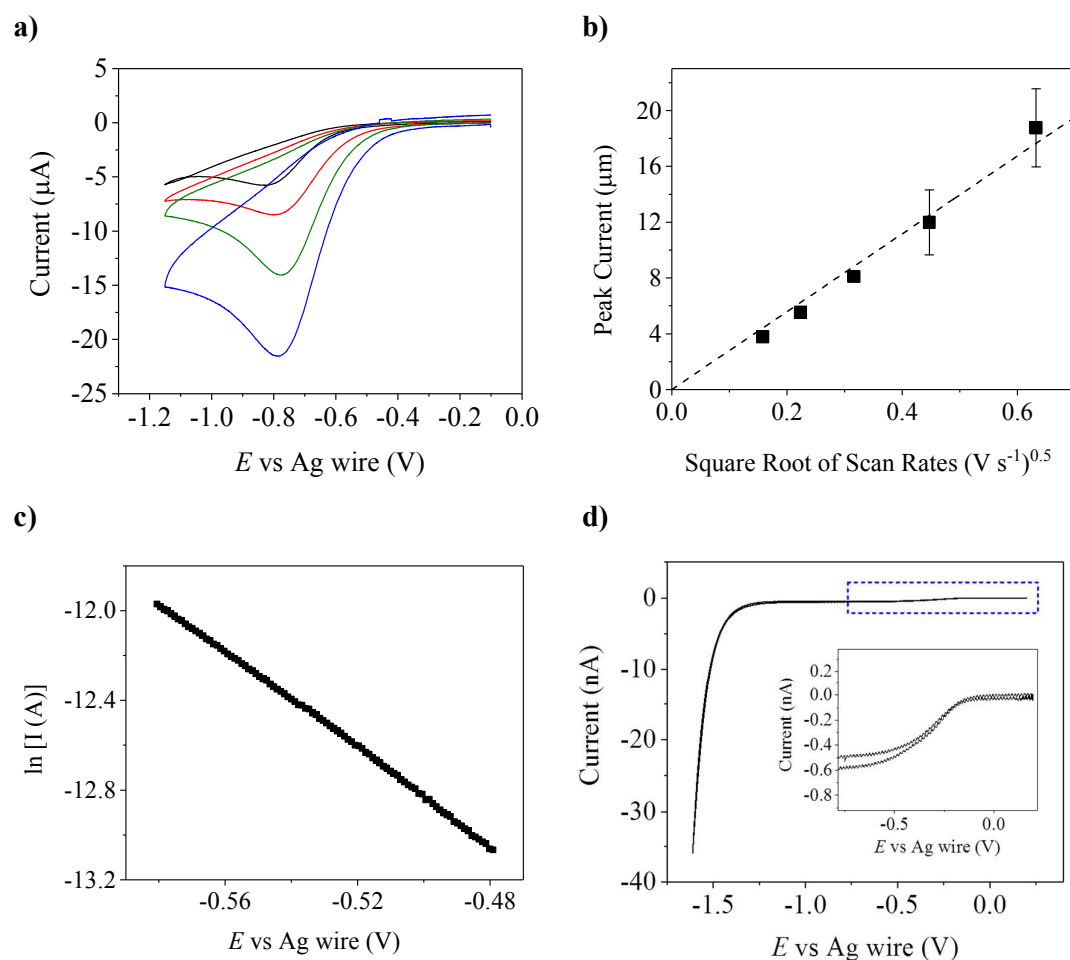

**Figure S5:** a) Cyclic voltammograms (CV) of oxygen reduction in 2.77 M  $\text{Mg}(\text{ClO}_4)_2$  at  $-31.0^\circ\text{C}$  at a glassy carbon electrode at a series of scan rates: 50  $\text{mV s}^{-1}$  (black), 100  $\text{mV s}^{-1}$  (red), 200  $\text{mV s}^{-1}$  (green), 400  $\text{mV s}^{-1}$  (blue). b) The plot of oxygen reduction peak currents as a function of the square root of scan rates. c) Tafel analysis of the CV of oxygen reduction at 400  $\text{mV s}^{-1}$ . d) CV of oxygen reduction in 2.77 M  $\text{Mg}(\text{ClO}_4)_2$  at  $-31.0^\circ\text{C}$  at a gold micro-electrode at the scan rate of 20  $\text{mV s}^{-1}$ .

## S5 Carbon dioxide reduction

Figure S6 below shows that *no* cathodic responses of carbon dioxide ( $\text{CO}_2$ ) reduction could be observed prior to solvent breakdown in the 2.77 M  $\text{Mg}(\text{ClO}_4)_2$  brine at a glassy carbon electrode.

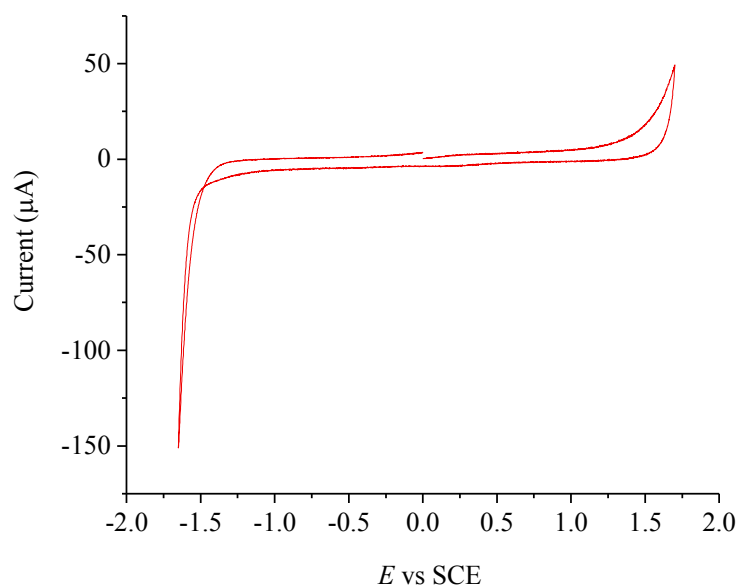

**Figure S6: Cyclic voltammograms (CV) of 2.77 M  $\text{Mg}(\text{ClO}_4)_2$  saturated with carbon dioxide at a glassy carbon electrode. Scan rate of  $200 \text{ mV s}^{-1}$ .**

Note that although in ionic liquids and organic solvents, superoxide (an intermediate in the oxygen reduction process) has been reported to readily react with carbon dioxide,<sup>1-3</sup> most likely in aqueous environment, the disproportionation of superoxide would outrun the reaction with  $\text{CO}_2$ . Consequently, the presence of  $\text{CO}_2$  is expected not to interfere with the electrochemical responses of  $\text{O}_2$  reduction studied herein.



## References

1. Wadhawan, J. D.; Welford, P. J.; Maisonhaute, E.; Climent, V.; Lawrence, N. S.; Compton, R. G.; McPeak, H. B.; Hahn, C. E. W., Microelectrode Studies of the Reaction of Superoxide with Carbon Dioxide in Dimethyl Sulfoxide. *The Journal of Physical Chemistry B* **2001**, *105* (43), 10659-10668.
2. Wadhawan, J. D.; Welford, P. J.; McPeak, H. B.; Hahn, C. E. W.; Compton, R. G., The simultaneous voltammetric determination and detection of oxygen and carbon dioxide. *Sensors and Actuators B: Chemical* **2003**, *88* (1), 40-52.
3. Buzzeo, M. C.; Klymenko, O. V.; Wadhawan, J. D.; Hardacre, C.; Seddon, K. R.; Compton, R. G., Kinetic Analysis of the Reaction between Electrogenenerated Superoxide and Carbon Dioxide in the Room Temperature Ionic Liquids 1-Ethyl-3-methylimidazolium Bis(trifluoromethylsulfonyl)imide and Hexyltriethylammonium Bis(trifluoromethylsulfonyl)imide. *The Journal of Physical Chemistry B* **2004**, *108* (12), 3947-3954.
